# Supplementary material for: Malaria Control Interventions Contributed to Declines in Malaria Parasitemia, Severe Anemia, and All-Cause Mortality in Children Less Than 5 Years of Age in Malawi, 2000–2010
Source: PubMed Central journal article supplement (PMC5619935; doi:10.4269/ajtmh.17-0203), 2017-09-27
Supplement: tpmd170203.SD1.pdf [file tpmd170203.SD1.pdf]

The following are supplemental materials and will be published online only

doi:10.4269/ajtmh.17-0203.s001

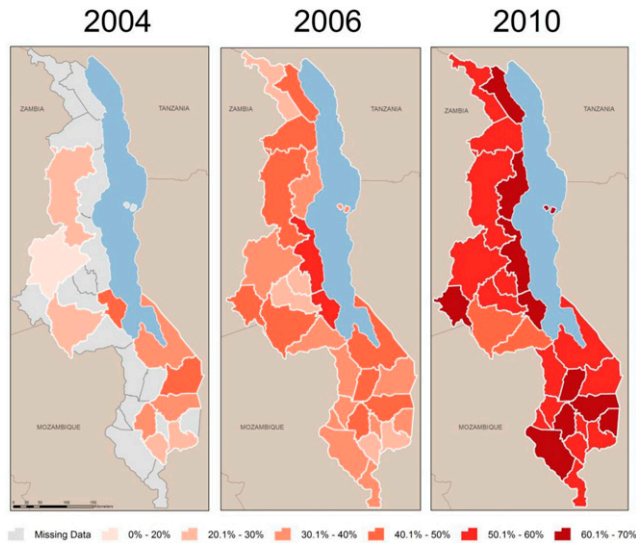

SUPPLEMENTAL FIGURE 1. Household ownership of insecticide-treated nets (ITNs) by district, Malawi, 2004–2010. Household ITN ownership was mapped by district from the 2004 and 2010 Demographic and Health Survey and the 2006 Multiple Indicator Cluster Survey.

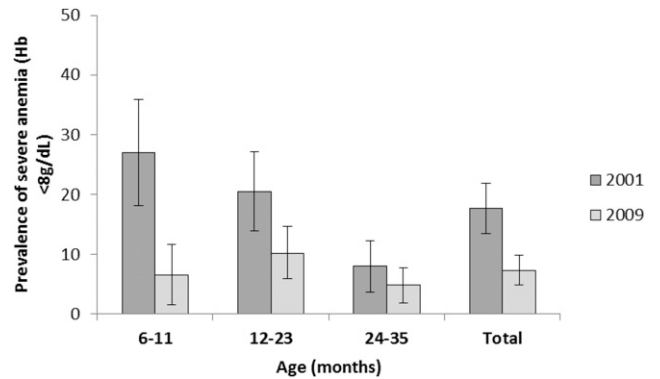

SUPPLEMENTAL FIGURE 2. Severe anemia (hemoglobin < 8 g/dL) prevalence in children 6–35 months by age, Malawi, 2001 and 2009. Anemia prevalence data are from the 2001 and 2009 National Micronutrient Surveys conducted in the low malaria transmission season for children 6–35 months of age (total) and further disaggregated by age.

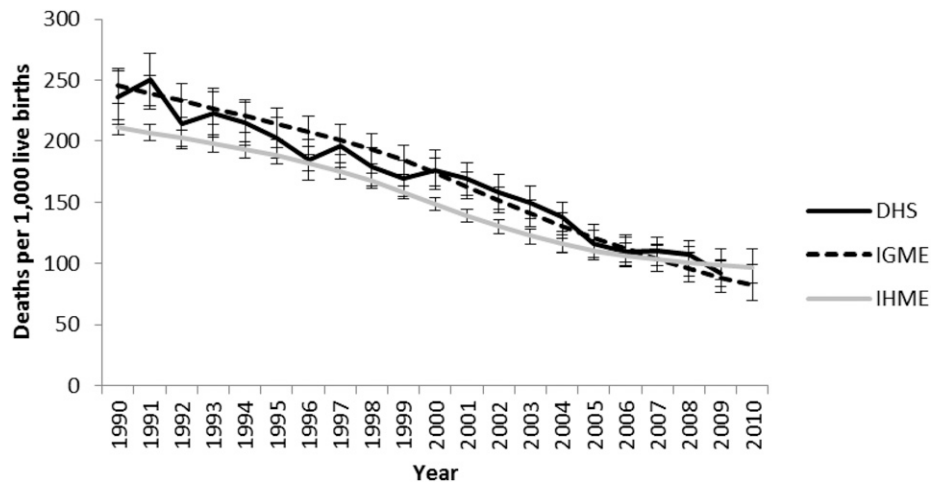

SUPPLEMENTAL FIGURE 3. Annual estimates were calculated for all-cause under-five mortality from 1990 to 2010 using the 2000 and 2010 Demographic and Health Survey (DHS). United Nations Interagency Group for Child Mortality Estimation (IGME)<sup>34</sup> and Institute for Health Metrics and Evaluation (IHME)<sup>35</sup> annual estimates of under-five mortality are also shown for comparison. Methods for calculating the IGME and IHME mortality estimates are described elsewhere.<sup>34,35</sup>

The following are supplemental materials and will be published online only

SUPPLEMENTAL TABLE 1  
Malaria indicators and data sources used in this evaluation

| Indicator                                                                                                                                                              | Data source                                                                                                                                        |
|------------------------------------------------------------------------------------------------------------------------------------------------------------------------|----------------------------------------------------------------------------------------------------------------------------------------------------|
| Proportion of households with at least one ITN                                                                                                                         | 2004, 2010 DHS; 2006 MICS                                                                                                                          |
| Proportion of children under 5 years old who slept under an ITN the previous night                                                                                     | 2000, 2004, 2010 DHS; 2006 MICS                                                                                                                    |
| Proportion of pregnant women who slept under an ITN the previous night                                                                                                 | 2000, 2004, 2010 DHS; 2006 MICS                                                                                                                    |
| Proportion of population who slept under an ITN the previous night                                                                                                     | 2004, 2010 DHS                                                                                                                                     |
| Proportion of households sprayed by IRS in the last 12 months                                                                                                          | 2010 DHS                                                                                                                                           |
| Proportion of women who received two doses of SP for malaria during their last pregnancy                                                                               | 2000, 2004, 2010 DHS; 2006 MICS                                                                                                                    |
| Proportion of children under 5 years old with fever in the last 2 weeks for whom advice or treatment was sought                                                        | 2000, 2004, 2010 DHS                                                                                                                               |
| Proportion of children under 5 years old with fever in the last 2 weeks for whom advice or treatment was sought within 24 hours                                        | 2000, 2004, 2010 DHS                                                                                                                               |
| Proportion of children under 5 years old with fever in last 2 weeks who received any antimalarial treatment                                                            | 2000, 2004, 2010 DHS; 2006 MICS                                                                                                                    |
| Proportion of children under 5 years old with fever in last 2 weeks who received first-line treatment according to national policy                                     | 2000, 2004, 2010 DHS; 2006 MICS                                                                                                                    |
| Proportion of children under 5 years old with fever in last 2 weeks who received first-line treatment according to national policy within 24 hours from onset of fever | 2000, 2004, 2010 DHS; 2006 MICS                                                                                                                    |
| Proportion receiving first-line treatment, among children under 5 years old with fever in the last 2 weeks who received any antimalarial drugs                         | 2000, 2004, 2010 DHS; 2006 MICS                                                                                                                    |
| Severe anemia prevalence: proportion of children aged 6–59 months with a hemoglobin measurement of < 8 g/dL                                                            | 2004 and 2010 DHS; 2001 and 2009 National Micronutrient Surveys (6–35 months); 2005–2009 sub-national Anemia and Parasitemia surveys (6–30 months) |
| Parasite Prevalence: proportion of children aged 6–59 months with malaria infection [all surveys used microscopy]                                                      | 2010 MIS; 2001 and 2009 National Micronutrient Surveys (6–35 months); 2005–2009 sub-national Anemia and Parasitemia surveys (6–30 months)          |
| All-cause under 5 mortality rate                                                                                                                                       | 2000, 2004, 2010 DHS                                                                                                                               |

DHS = Demographic and Health Survey; ITN = insecticide-treated net; IRS = indoor residual spraying; MICS = Multiple Indicator Cluster Survey; MIS = Malaria Indicator Survey; SP = sulfadoxine-pyrimethamine.

SUPPLEMENTAL TABLE 2  
ITN use among children less than 5 years of age by background characteristics, Malawi, 2000–2010

|                           | 2000 |           |        | 2004 |           |        | 2006 |           |        | 2010 |           |        | Relative change (%)* |
|---------------------------|------|-----------|--------|------|-----------|--------|------|-----------|--------|------|-----------|--------|----------------------|
|                           | %    | 95% CI    | WN     | %    | 95% CI    | WN     | %    | 95% CI    | WN     | %    | 95% CI    | WN     |                      |
| <b>Sex</b>                |      |           |        |      |           |        |      |           |        |      |           |        |                      |
| Male                      | 2.8  | 2.2–3.5   | 5,225  | 14.3 | 12.8–16.0 | 5,195  | 25.1 | 23.4–26.9 | 11,368 | 38.6 | 37.0–40.3 | 9,514  | 1,279                |
| Female                    | 2.7  | 2.1–3.6   | 5,334  | 15.2 | 13.6–17.0 | 5,344  | 24.2 | 22.6–26.0 | 11,626 | 40.2 | 38.5–41.9 | 9,905  | 1,389                |
| <b>Residence</b>          |      |           |        |      |           |        |      |           |        |      |           |        |                      |
| Urban                     | 11.5 | 9.2–14.2  | 1,358  | 30.2 | 25.5–35.4 | 1,420  | 42.3 | 38.4–46.3 | 3,366  | 48.4 | 43.6–53.2 | 2,634  | 321                  |
| Rural                     | 1.5  | 1.1–1.9   | 9,201  | 12.4 | 11.1–13.8 | 9,119  | 21.6 | 20.5–22.8 | 19,628 | 38.0 | 36.5–39.5 | 16,785 | 2,433                |
| <b>Wealth quintile</b>    |      |           |        |      |           |        |      |           |        |      |           |        |                      |
| Lowest                    | 0.6  | 0.3–1.1   | 2,311  | 6.4  | 4.8–8.3   | 2,090  | 14.6 | 13.0–16.4 | 5,112  | 28.8 | 26.6–31.2 | 4,344  | 4,700                |
| Second                    | 0.9  | 0.5–1.5   | 2,144  | 9.2  | 7.7–11.0  | 2,294  | 19.9 | 17.7–22.3 | 4,686  | 35.1 | 32.9–37.4 | 4,200  | 3,800                |
| Middle                    | 2.2  | 1.2–4.1   | 1,965  | 12.1 | 10.3–14.2 | 2,358  | 24.1 | 21.9–26.5 | 4,736  | 41.5 | 39.0–44.0 | 4,158  | 1,786                |
| Fourth                    | 2.4  | 1.6–3.5   | 2,120  | 16.7 | 14.4–19.2 | 2,071  | 25.5 | 23.2–28.1 | 4,243  | 42.1 | 39.5–44.8 | 3,587  | 1,654                |
| Highest                   | 8.2  | 6.6–10.1  | 2,007  | 33.8 | 29.4–38.5 | 1,726  | 41.8 | 38.7–45.1 | 4,217  | 54.0 | 50.8–57.2 | 3,130  | 559                  |
| <b>Mother's education</b> |      |           |        |      |           |        |      |           |        |      |           |        |                      |
| None                      | 0.8  | 0.5–1.3   | 3,388  | 7.3  | 6.1–8.7   | 2,557  | 18.1 | 15.4–21.3 | 5,614  | 32.4 | 29.8–35.0 | 3,231  | 3,950                |
| Primary                   | 2.0  | 1.5–2.7   | 6,453  | 15.3 | 13.7–17.0 | 6,219  | 23.6 | 22.3–25.0 | 14,875 | 39.7 | 38.2–41.3 | 12,250 | 1,885                |
| Secondary+                | 18.4 | 14.9–22.4 | 718    | 33.8 | 29.3–38.5 | 1,025  | 46.2 | 42.9–49.5 | 2,442  | 56.6 | 53.2–60.0 | 2,563  | 208                  |
| Missing                   | –    | –         | –      | 10.1 | 7.3–13.8  | 737    | 23.6 | 12.9–39.2 | 53     | 21.1 | 18.1–24.6 | 1,376  | –                    |
| <b>Total</b>              | 2.8  | 2.2–3.4   | 10,599 | 14.8 | 13.4–16.3 | 10,539 | 24.7 | 23.1–26.3 | 22,994 | 39.4 | 38.0–40.8 | 19,420 | 1,307                |

CI = confidence interval; DHS = Demographic and Health Survey; ITN = insecticide-treated net; MICS = Multiple Indicator Cluster Survey; WN = weighted number of units (denominator). Data are from the 2000, 2004, and 2010 DHS and 2006 MICS surveys.

\* Relative change between the 2000 and 2010 estimates. Sample sizes vary based on the population of interest corresponding to each indicator.

The following are supplemental materials and will be published online only

SUPPLEMENTAL TABLE 3  
ITN use among pregnant women by background characteristics, Malawi, 2000–2010

|                          | 2000 |          |       | 2004 |           |       | 2006* |           |     | 2010 |           |       | Relative change (%)† |
|--------------------------|------|----------|-------|------|-----------|-------|-------|-----------|-----|------|-----------|-------|----------------------|
|                          | %    | 95% CI   | WN    | %    | 95% CI    | WN    | %     | 95% CI    | WN  | %    | 95% CI    | WN    |                      |
| <b>Residence</b>         |      |          |       |      |           |       |       |           |     |      |           |       |                      |
| Urban                    | 9.6  | 5.6–16.0 | 206   | 29.8 | 21.9–39.2 | 183   | 40.3  | 24.4–58.6 | 85  | 43.6 | 32.2–55.7 | 248   | 354                  |
| Rural                    | 1.6  | 1.0–2.5  | 1,362 | 12.4 | 10.4–14.8 | 1,222 | 22.2  | 17.7–27.5 | 453 | 34.1 | 31.5–36.8 | 1,838 | 2,031                |
| <b>Wealth quintile</b>   |      |          |       |      |           |       |       |           |     |      |           |       |                      |
| Lowest                   | 0.7  | 0.2–2.4  | 335   | 6.0  | 3.7–9.6   | 247   | 14.3  | 7.2–26.3  | 87  | 22.5 | 18.4–27.2 | 416   | 3,114                |
| Second                   | 0.3  | 0.0–1.8  | 288   | 9.6  | 6.8–13.5  | 319   | 16.7  | 9.7–27.4  | 141 | 28.6 | 24.2–33.6 | 478   | 9,433                |
| Middle                   | 2.7  | 1.4–5.1  | 309   | 12.6 | 9.3–16.8  | 342   | 16.8  | 9.4–28.2  | 120 | 38.1 | 33.2–43.3 | 481   | 1,311                |
| Fourth                   | 2.5  | 1.2–5.0  | 344   | 17.0 | 12.2–23.1 | 284   | 47.9  | 30.3–66.0 | 110 | 42.2 | 36.4–48.2 | 370   | 1,588                |
| Highest                  | 7.4  | 4.3–12.5 | 289   | 32.6 | 25.1–41.1 | 213   | 32.7  | 18.4–51.2 | 80  | 48.5 | 39.2–58.0 | 341   | 555                  |
| <b>Woman's education</b> |      |          |       |      |           |       |       |           |     |      |           |       |                      |
| None                     | 0.7  | 0.2–2.1  | 426   | 8.6  | 5.8–12.4  | 309   | 19.4  | 12.1–29.8 | 111 | 31.7 | 25.5–38.6 | 294   | 4,429                |
| Primary                  | 2.0  | 1.3–3.2  | 1,032 | 14.5 | 12.0–17.4 | 927   | 26.3  | 20.3–33.4 | 379 | 33.0 | 30.1–36.0 | 1,479 | 1,550                |
| Secondary +              | 15.9 | 9.2–26.0 | 110   | 26.7 | 19.0–36.1 | 169   | 28.9  | 14.9–48.6 | 47  | 49.3 | 42.4–56.1 | 312   | 210                  |
| Missing                  | –    | –        | –     | –    | –         | –     | –     | –         | –   | 44.2 | 8.8–86.6  | 2     | –                    |
| <b>Total</b>             | 2.6  | 1.8–3.8  | 1,568 | 14.7 | 12.5–17.1 | 1,405 | 25.1  | 19.9–31.1 | 538 | 35.2 | 32.6–38.0 | 2,086 | 1,254                |

CI = confidence interval; DHS = Demographic and Health Survey; MICS = Multiple Indicator Cluster Survey; WN = weighted number of units (denominator).

\* Based on pregnant women who had a birth in the past 2 years (2006). The other surveys are based on pregnant women who had a birth in the past 5 years. Data is from the 2000, 2004, and 2010 DHS and 2006 MICS surveys. Sample sizes vary based on the population of interest corresponding to each indicator.

† Relative change is from 2000 to 2010.

SUPPLEMENTAL TABLE 4  
Use of intermittent preventive treatment during pregnancy\* by background characteristics, Malawi, 2000–2010

|                          | 2000 |           |       | 2004 |           |       | 2006 |           |        | 2010 |           |       | Relative change (%)† |
|--------------------------|------|-----------|-------|------|-----------|-------|------|-----------|--------|------|-----------|-------|----------------------|
|                          | %    | 95% CI    | WN    | %    | 95% CI    | WN    | %    | 95% CI    | WN     | %    | 95% CI    | WN    |                      |
| <b>Residence</b>         |      |           |       |      |           |       |      |           |        |      |           |       |                      |
| Urban                    | 31.5 | 27.4–35.9 | 644   | 53.8 | 48.8–58.7 | 583   | 55.1 | 50.2–59.9 | 1,507  | 55.9 | 51.0–60.7 | 1,138 | 77.5                 |
| Rural                    | 27.8 | 26.1–29.4 | 4,419 | 45.4 | 43.4–47.4 | 4,021 | 45.3 | 43.7–47.0 | 9,045  | 54.8 | 53.2–56.5 | 6,586 | 97.1                 |
| <b>Wealth quintile</b>   |      |           |       |      |           |       |      |           |        |      |           |       |                      |
| Lowest                   | 25.7 | 22.7–29.0 | 1,118 | 42.1 | 38.2–46.0 | 919   | 41.8 | 38.4–45.2 | 2,442  | 52.7 | 49.5–55.8 | 1,669 | 105.1                |
| Second                   | 27.2 | 24.1–30.4 | 1,023 | 42.6 | 39.1–46.3 | 1,111 | 44.2 | 41.1–47.4 | 2,225  | 54.3 | 51.5–57.2 | 1,669 | 99.6                 |
| Middle                   | 28.9 | 25.6–32.5 | 915   | 46.2 | 42.7–49.7 | 1,001 | 47.0 | 44.0–50.0 | 2,164  | 56.9 | 53.8–59.9 | 1,689 | 96.9                 |
| Fourth                   | 29.8 | 26.9–32.8 | 1,060 | 47.8 | 44.1–51.5 | 871   | 48.1 | 44.2–52.0 | 1,899  | 56.2 | 52.8–59.6 | 1,409 | 88.6                 |
| Highest                  | 29.9 | 26.5–33.4 | 943   | 57.0 | 52.9–61.0 | 701   | 54.6 | 51.0–58.1 | 1,822  | 55.1 | 51.0–59.1 | 1,288 | 84.3                 |
| <b>Woman's education</b> |      |           |       |      |           |       |      |           |        |      |           |       |                      |
| None                     | 25.9 | 23.3–28.6 | 1,507 | 39.7 | 36.1–43.4 | 1,110 | 39.4 | 36.7–42.2 | 2,407  | 52.5 | 48.6–56.4 | 1,249 | 102.7                |
| Primary                  | 28.3 | 26.4–30.4 | 3,172 | 47.1 | 44.9–49.4 | 2,960 | 46.7 | 44.9–48.5 | 6,912  | 54.7 | 52.8–56.6 | 5,236 | 93.3                 |
| Secondary +              | 36.7 | 31.0–42.8 | 383   | 57.0 | 51.9–61.9 | 534   | 60.8 | 55.2–66.2 | 1,232  | 58.9 | 55.2–62.5 | 1,239 | 60.5                 |
| <b>Total</b>             | 28.2 | 26.7–29.8 | 5,063 | 46.5 | 44.6–48.3 | 4,604 | 46.7 | 45.0–48.4 | 10,552 | 55.0 | 53.4–56.6 | 7,724 | 95.0                 |

CI = confidence interval; DHS = Demographic and Health Survey; MICS = Multiple Indicator Cluster Survey; SP = sulfadoxine-pyrimethamine; WN = weighted number of units (denominator).

\* Percentage of women age 15–49 with a live birth in the 2 years preceding the survey who received at least two doses of SP/Fansidar without regard to the source of SP for prevention of malaria during last pregnancy. Data are from the 2000, 2004, and 2010 DHS and 2006 MICS surveys. Sample sizes vary based on the population of interest corresponding to each indicator.

† Relative change is from 2000 to 2010.

The following are supplemental materials and will be published online only

SUPPLEMENTAL TABLE 5

Care seeking\* for fever in children less than 5 years of age, by background characteristics, Malawi, 2000–2010

|                                       | 2000 |           |       | 2004 |           |       | 2006 |           |       | 2010 |           |       | Relative change (%)† |
|---------------------------------------|------|-----------|-------|------|-----------|-------|------|-----------|-------|------|-----------|-------|----------------------|
|                                       | %    | 95% CI    | WN    | %    | 95% CI    | WN    | %    | 95% CI    | WN    | %    | 95% CI    | WN    |                      |
| Sex                                   |      |           |       |      |           |       |      |           |       |      |           |       |                      |
| Male                                  | 34.8 | 32.2–37.6 | 2,179 | 42.6 | 39.7–45.5 | 1,793 | 43.4 | 41.1–45.8 | 3,887 | 65.4 | 63.0–67.7 | 3,161 | 87.9                 |
| Female                                | 35.7 | 33.1–38.4 | 2,215 | 40.0 | 37.0–43.2 | 1,837 | 42.5 | 40.0–45.0 | 4,102 | 65.3 | 63.2–67.4 | 3,053 | 82.9                 |
| Residence                             |      |           |       |      |           |       |      |           |       |      |           |       |                      |
| Urban                                 | 45.8 | 38.1–53.6 | 434   | 56.8 | 50.4–63.1 | 401   | 54.6 | 48.0–61.1 | 993   | 69.2 | 64.3–73.7 | 786   | 51.1                 |
| Rural                                 | 34.1 | 31.9–36.4 | 3,961 | 39.4 | 36.9–41.8 | 3,230 | 41.3 | 39.6–43.0 | 6,997 | 64.8 | 63.0–66.6 | 5,428 | 90.0                 |
| Wealth quintile                       |      |           |       |      |           |       |      |           |       |      |           |       |                      |
| Lowest                                | 33.9 | 30.1–37.9 | 1,032 | 35.7 | 31.5–40.1 | 757   | 40.3 | 36.2–44.4 | 1,899 | 61.1 | 57.6–64.5 | 1,397 | 80.2                 |
| Second                                | 34.3 | 30.6–38.2 | 884   | 41.0 | 36.6–45.5 | 894   | 42.8 | 39.3–46.3 | 1,685 | 61.7 | 58.2–65.1 | 1,357 | 79.9                 |
| Middle                                | 34.4 | 30.4–38.6 | 783   | 38.7 | 34.7–43.0 | 830   | 40.0 | 37.0–43.1 | 1,735 | 69.0 | 65.9–71.9 | 1,469 | 100.6                |
| Fourth                                | 31.7 | 27.8–35.9 | 944   | 44.7 | 40.2–49.3 | 676   | 45.2 | 41.9–48.4 | 1,530 | 64.8 | 60.9–68.4 | 1,127 | 104.4                |
| Highest                               | 44.2 | 38.6–49.8 | 745   | 50.4 | 44.5–56.3 | 474   | 49.2 | 44.8–53.7 | 1,141 | 72.7 | 68.0–77.0 | 865   | 64.5                 |
| Mother's education                    |      |           |       |      |           |       |      |           |       |      |           |       |                      |
| None                                  | 30.5 | 27.3–33.9 | 1,404 | 34.5 | 31.0–38.2 | 911   | 40.8 | 36.4–45.3 | 1,985 | 59.5 | 55.3–63.6 | 952   | 95.1                 |
| Primary                               | 36.0 | 33.5–38.7 | 2,768 | 42.0 | 39.3–44.9 | 2,379 | 41.7 | 39.9–43.4 | 5,206 | 65.2 | 63.2–67.2 | 4,429 | 81.1                 |
| Secondary +<br>Nonstandard curriculum | 56.0 | 44.0–67.3 | 223   | 54.1 | 46.8–61.2 | 340   | 57.1 | 50.5–63.4 | 784   | 73.0 | 68.5–77.1 | 833   | 30.4                 |
| –                                     | –    | –         | –     | –    | –         | –     | 42.5 | 21.5–66.6 | 16    | –    | –         | –     | –                    |
| Total                                 | 35.3 | 33.1–37.5 | 4,394 | 41.3 | 38.9–43.7 | 3,630 | 43.0 | 41.0–44.9 | 7,990 | 65.4 | 63.6–67.1 | 6,214 | 85.3                 |

CI = confidence interval; DHS = Demographic and Health Survey; MICS = Multiple Indicator Cluster Survey; WN = weighted number of units (denominator).

\* Care seeking refers to seeking advice or treatment of fever from a public or private health professional or from a pharmacy, including health surveillance assistants (HSAs)/community health workers, but excluding shops and traditional healers. Data from 2000, 2004, 2010 DHS and 2006 MICS. Sample sizes vary based on the population of interest corresponding to each indicator.

† Relative change from 2000 to 2010.

SUPPLEMENTAL TABLE 6

Among children less than 5 years of age with recent fever who received antimalarial treatment proportion who received recommended treatment\*, by background characteristics, Malawi, 2000–2010

|                                       | 2000 |           |       | 2004 |           |       | 2006 |           |       | 2010 |           |       | Relative change (%)† |
|---------------------------------------|------|-----------|-------|------|-----------|-------|------|-----------|-------|------|-----------|-------|----------------------|
|                                       | %    | 95% CI    | WN    | %    | 95% CI    | WN    | %    | 95% CI    | WN    | %    | 95% CI    | WN    |                      |
| Sex                                   |      |           |       |      |           |       |      |           |       |      |           |       |                      |
| Male                                  | 84.6 | 80.5–87.9 | 586   | 83.7 | 79.8–87.0 | 515   | 79.0 | 75.2–82.3 | 1,003 | 81.8 | 78.8–84.4 | 1,369 | –3.3                 |
| Female                                | 87.4 | 83.9–90.2 | 603   | 80.7 | 76.1–84.5 | 517   | 83.3 | 80.0–86.2 | 987   | 86.0 | 83.1–88.5 | 1,328 | –1.6                 |
| Residence                             |      |           |       |      |           |       |      |           |       |      |           |       |                      |
| Urban                                 | 81.8 | 71.7–88.9 | 146   | 81.7 | 69.2–89.8 | 168   | 78.9 | 71.1–85.1 | 319   | 80.8 | 71.3–87.8 | 335   | –1.2                 |
| Rural                                 | 86.6 | 83.6–89.1 | 1,043 | 82.3 | 79.3–84.9 | 864   | 81.5 | 78.8–84.0 | 1,671 | 84.3 | 82.0–86.3 | 2,362 | –2.7                 |
| Wealth quintile                       |      |           |       |      |           |       |      |           |       |      |           |       |                      |
| Lowest                                | 88.8 | 81.2–93.6 | 255   | 83.6 | 75.6–89.4 | 176   | 83.2 | 75.6–88.8 | 374   | 86.0 | 81.8–89.4 | 571   | –3.2                 |
| Second                                | 90.4 | 85.5–93.8 | 226   | 85.0 | 78.9–89.5 | 235   | 83.1 | 78.5–86.9 | 417   | 87.7 | 84.0–90.7 | 577   | –3.0                 |
| Middle                                | 83.0 | 76.5–88.0 | 206   | 79.6 | 73.4–84.6 | 211   | 81.0 | 74.5–86.1 | 434   | 86.3 | 82.6–89.3 | 659   | 4.0                  |
| Fourth                                | 91.5 | 86.6–94.7 | 243   | 83.9 | 77.3–88.8 | 223   | 79.8 | 72.5–85.6 | 406   | 80.7 | 75.5–84.9 | 492   | –11.8                |
| Highest                               | 76.5 | 69.3–82.4 | 258   | 78.3 | 69.6–85.1 | 187   | 78.3 | 72.3–83.3 | 359   | 75.1 | 69.2–80.3 | 399   | –1.8                 |
| Mother's education                    |      |           |       |      |           |       |      |           |       |      |           |       |                      |
| None                                  | 88.1 | 82.1–92.3 | 335   | 82.6 | 76.1–87.7 | 196   | 82.4 | 74.4–88.3 | 427   | 84.6 | 78.8–89.0 | 373   | –4.0                 |
| Primary                               | 85.9 | 82.4–88.8 | 758   | 83.2 | 79.7–86.2 | 695   | 81.4 | 78.1–84.2 | 1,279 | 85.1 | 82.7–87.1 | 1,935 | –0.9                 |
| Secondary +<br>Nonstandard curriculum | 79.1 | 62.8–89.4 | 96    | 76.5 | 67.4–83.7 | 141   | 78.2 | 69.5–84.9 | 279   | 77.2 | 70.2–83.0 | 388   | –2.4                 |
| –                                     | –    | –         | –     | –    | –         | –     | 71.7 | 29.5–93.9 | 5     | –    | –         | –     | –                    |
| Total                                 | 86.0 | 83.2–88.4 | 1,189 | 82.2 | 79.1–84.9 | 1,032 | 81.1 | 78.6–83.4 | 1,990 | 83.9 | 81.7–85.9 | 2,696 | –2.4                 |

ACT = artemisinin-based combination therapy; CI = confidence interval; DHS = Demographic and Health Survey; MICS = Multiple Indicator Cluster Survey; SP = sulfadoxine-pyrimethamine; WN = weighted number of units (denominator).

\* SP was the recommended antimalarial in 2000, 2004, and 2006; ACT (AL) in 2010. Data from 2000, 2004, 2010 DHS and 2006 MICS. Sample sizes vary based on the population of interest corresponding to each indicator.

† Relative change from 2000 to 2010.

The following are supplemental materials and will be published online only

SUPPLEMENTAL TABLE 7

Severe anemia (hemoglobin < 8 g/dL) prevalence in children 6–59 months of age, by background characteristics, Malawi, 2004 and 2010

|                           | 2004        |                 |              | 2010       |                 |              | Relative change (%)* |
|---------------------------|-------------|-----------------|--------------|------------|-----------------|--------------|----------------------|
|                           | %           | 95% CI          | WN           | %          | 95% CI          | WN           |                      |
| <b>Sex</b>                |             |                 |              |            |                 |              |                      |
| Male                      | 11.6        | 9.6–14.0        | 1,060        | 9.1        | 7.7–10.8        | 2,224        | -21.6                |
| Female                    | 9.7         | 7.8–12.0        | 1,113        | 8.2        | 6.7–10.0        | 2,291        | -15.5                |
| <b>Residence</b>          |             |                 |              |            |                 |              |                      |
| Urban                     | 4.9         | 2.4–9.8         | 231          | 6.8        | 4.2–10.9        | 636          | 38.8                 |
| Rural                     | 11.3        | 9.7–13.2        | 1,942        | 9.0        | 7.8–10.4        | 3,879        | -20.4                |
| <b>Wealth quintile</b>    |             |                 |              |            |                 |              |                      |
| Lowest                    | 13.4        | 10.2–17.5       | 414          | 11.4       | 8.9–14.5        | 819          | -14.9                |
| Second                    | 14.2        | 10.6–18.8       | 490          | 9.3        | 7.2–12.0        | 1,038        | -34.5                |
| Middle                    | 9.4         | 6.8–12.7        | 537          | 9.3        | 7.0–12.2        | 997          | -1.1                 |
| Fourth                    | 10.0        | 7.1–13.8        | 454          | 7.9        | 5.8–10.6        | 833          | -21.0                |
| Highest                   | 3.8         | 2.0–7.1         | 280          | 5.3        | 3.6–7.8         | 828          | 39.5                 |
| <b>Mother's education</b> |             |                 |              |            |                 |              |                      |
| None                      | 14.3        | 11.0–18.4       | 533          | 10.7       | 8.0–14.2        | 767          | -25.2                |
| Primary                   | 10.2        | 8.5–12.1        | 1,283        | 8.9        | 7.5–10.4        | 2,900        | -12.7                |
| Secondary +               | 10.6        | 6.6–16.6        | 200          | 6.4        | 4.2–9.7         | 619          | -39.6                |
| Missing                   | 2.1         | 0.8–5.0         | 158          | 5.8        | 3.2–10.0        | 229          | -                    |
| <b>Total</b>              | <b>10.6</b> | <b>9.1–12.4</b> | <b>2,173</b> | <b>8.7</b> | <b>7.6–10.0</b> | <b>4,515</b> | <b>-17.9</b>         |

CI = confidence interval; DHS = Demographic and Health Survey; MICS = Multiple Indicator Cluster Survey; WN = weighted number of units (denominator). Data are from the 2004 and 2010 DHS surveys. Sample sizes vary based on the population of interest corresponding to each indicator. The 2000 DHS and 2006 MICS did not collect information on anemia.

\* Relative change from 2004 to 2010.

SUPPLEMENTAL TABLE 8

Trends in age-specific childhood mortality, Malawi, 1996–2000, 2000–2004, and 2006–2010

|                              | 1996–2000 |         | 2000–2004 |         | 2006–2010 |         | Relative change (%)* |
|------------------------------|-----------|---------|-----------|---------|-----------|---------|----------------------|
|                              | Estimate  | 95% CI  | Estimate  | 95% CI  | Estimate  | 95% CI  |                      |
| Neonatal mortality (NN)      | 42        | 37–47   | 27        | 23–31   | 31        | 28–35   | -26.2                |
| Postneonatal mortality (PNN) | 62        | 56–67   | 49        | 44–54   | 35        | 31–39   | -43.5                |
| Infant mortality (1q0)       | 104       | 96–111  | 76        | 69–83   | 66        | 61–71   | -36.5                |
| Child mortality (4q1)        | 95        | 87–102  | 62        | 55–68   | 50        | 45–54   | -47.4                |
| Under-five mortality (5q0)   | 189       | 179–198 | 133       | 124–142 | 112       | 106–119 | -40.7                |

CI = confidence interval; DHS = Demographic and Health Survey; Age-specific all-cause mortality (per 1,000 live births) for 5-year periods preceding the survey is shown. Data are from the 2000, 2004, and 2010 DHS surveys.

\* Relative change from 1996–2000 to 2006–2010 periods. NN = neonatal mortality (first month), per 1,000 live births; PNN = post-neonatal mortality (age 1–11 months), per 1,000 live births;  ${}_1q_0$  = infant mortality (first year), per 1,000 live births;  ${}_4q_1$  = child mortality between exact age 1 and exact age 5, per 1,000 children surviving to 12 months of age;  ${}_5q_0$  = under-five mortality, per 1,000 live births.

SUPPLEMENTAL TABLE 9

Additional household attributes and maternal and child health intervention coverage, Malawi, 2000 and 2010

| Indicators                                                  | 2000 |           |        | 2010 |           |        | Relative change (%)** | Sig |
|-------------------------------------------------------------|------|-----------|--------|------|-----------|--------|-----------------------|-----|
|                                                             | %    | 95% CI    | WN     | %    | 95% CI    | WN     |                       |     |
| Time to water source < 15 minutes (% households)            | 33.4 | 31.2–35.7 | 14,213 | 34.7 | 32.9–36.6 | 24,825 | 3.9                   | NS  |
| Modern floor material (not earth/sand/dung), (% households) | 18.8 | 16.5–21.4 | 14,213 | 23.3 | 21.3–25.3 | 24,825 | 23.9                  | NS  |
| Births in any high-risk fertility category (%)*             | 57.3 | 56.2–58.5 | 12,201 | 56.6 | 55.4–57.7 | 19,697 | -1.2                  | NS  |
| Births with unavoidable fertility risk (%)†                 | 16.5 | 15.7–17.3 | 12,201 | 14.4 | 13.7–15.1 | 19,697 | -12.7                 | S   |
| BCG (% children 12–23 months)                               | 92.4 | 90.7–93.8 | 2,238  | 97.2 | 96.4–97.8 | 3,774  | 5.2                   | S   |
| DPT3/DPT3-HBV-Hib (% children 12–23 months)                 | 84.2 | 81.8–86.4 | 2,238  | 93.0 | 91.7–94.2 | 3,774  | 10.5                  | S   |
| Polio3 (% children 12–23 months)                            | 79.8 | 77.2–82.2 | 2,238  | 85.6 | 83.9–87.2 | 3,774  | 7.3                   | S   |
| Measles (% children 12–23 months)                           | 83.2 | 80.9–85.3 | 2,238  | 93.0 | 91.8–94.0 | 3,774  | 11.8                  | S   |
| Children 0–4 years with diarrhea in previous 2 weeks (%)    | 17.6 | 16.7–18.6 | 10,559 | 17.5 | 16.8–18.3 | 18,013 | -0.6                  | NS  |
| Small/very small size at birth (mother's estimate) (%)      | 16.6 | 15.7–17.6 | 12,201 | 15.5 | 14.8–16.3 | 19,697 | -6.6                  | NS  |
| Low birth weight < 2,500 g (%)                              | 4.9  | 4.4–5.5   | 12,201 | 8.2  | 7.6–8.8   | 19,697 | 67.3                  | S   |

BCG = Bacillus Calmette-Guérin; DPT3 = diphtheria-tetanus-pertussis; HBV-Hib = *Haemophilus influenzae (b)* and Hepatitis B. CI = confidence interval; DHS = Demographic and Health Survey; Sig. = Statistical significance; WN = weighted number of units (denominator). Statistics with nonoverlapping 95% CIs are considered significantly different changes. NS denotes no statistically significant change and S denotes statistically significant change. Data are from the 2000 and 2010 DHS surveys. Sample sizes vary based on the population of interest corresponding to each indicator.

\* Births to women < 18 and > 34 and births < 2 years apart.

† First order births to women between the ages of 18 and 34.

\*\* Relative change from 2000 to 2010.
